# Supplementary material
Source: HighWire-hosted journal article supplement (https://thorax.bmj.com/content/thoraxjnl-2015-207961)
Supplement: inline-supplementary-material-1 [file inline-supplementary-material-1.pdf]

## **Online data supplement**

### **Assessing bronchodilator response in preschool children using spirometry**

Luciano E Busi<sup>(1)(2)</sup>; Sebastián Restuccia<sup>(2)</sup>; Ricardo Tourres<sup>(2)</sup>; Peter D Sly<sup>(3)</sup>

Pulmonology Committee of the Argentinean Pediatric Society<sup>(1)</sup>; Trelew Hospital, Argentina<sup>(2)</sup>; Children's Health and Environment Program, Child Health Research Centre, The University of Queensland, Brisbane, Australia<sup>(3)</sup>;

**Table E1: feasibility of Spirometry in Pre-schoolers**

| <b>Study</b>              | <b>Population</b>                        | <b>Setting</b>          | <b>Number</b>                                 | <b>Feasibility</b>                                                               | <b>Comment</b>                                                                                                      |
|---------------------------|------------------------------------------|-------------------------|-----------------------------------------------|----------------------------------------------------------------------------------|---------------------------------------------------------------------------------------------------------------------|
| Eigen <sup>1</sup>        | Healthy pre-schoolers<br>36 to 87 mo old | USA,<br>community       | 307<br>screened<br>259 eligible<br>187 white* | 214/259 (82.6%)                                                                  | Spirometry naïve<br>No age breakdown of<br>feasibility presented                                                    |
| Marostica <sup>2</sup>    | Cystic fibrosis<br>3 to 6y old           | USA, clinic             | 38                                            | 3y: 4/6 (66.6%)<br>4y: 9/11(81.8%)<br>5y: 10/10(100%)<br>6y:10/11 (90.9%)        | At least 2 acceptable<br>manoeuvres were required<br>Patients not spirometry<br>naïve                               |
| Jeng <sup>3</sup>         | Healthy pre-schoolers<br>36 to 83        | Taiwan,<br>community    | 248                                           | 3y: 33/45 (73.3%)<br>4y: 65/71 (91.5%)<br>5y: 65/71 (91.5%)<br>6y: 51/55 (92.7%) | not stated that no previous<br>spirometry                                                                           |
| Joseph-Bowen <sup>4</sup> | Longitudinal birth<br>cohort             | Australia,<br>Community | 1995                                          | 1735/1995 (87.0%)                                                                | No age breakdown of<br>feasibility presented<br>Population contained<br>asthmatic children<br>Most spirometry naïve |
| Kampschmidt <sup>5</sup>  | Healthy pre-schoolers<br>3 to 5y         | USA,<br>community       | 200                                           | 3y: 23/51 (45.1%)<br>4y: 67/103 (65.0%)<br>5y: 40/46 (87.0%)                     | 31 with known asthma and<br>8 diagnosed in the<br>population<br>One acceptable manoeuvre<br>sufficient              |
| Nystad <sup>6</sup>       | Healthy pre-schoolers<br>3 to 6y         | Norway,<br>community    | 630                                           | 3y: 51%**<br>4y: 69%<br>5y: 76%<br>6y: 78%                                       | 3 acceptable manoeuvres<br>required                                                                                 |
| Leung <sup>7</sup>        | Healthy pre-schoolers                    | Hong Kong,<br>Community | 1909                                          | <3y:63/155 (40.6%)<br>3y:333/532 (62.6%)                                         | Asthmatic children<br>included                                                                                      |

|                        |                            |                                 |     |                                                                                                                                           |                                                                                                                                                                |
|------------------------|----------------------------|---------------------------------|-----|-------------------------------------------------------------------------------------------------------------------------------------------|----------------------------------------------------------------------------------------------------------------------------------------------------------------|
|                        | 2 to 7y                    |                                 |     | 4y:447/572(78.1%)<br>5y:449/534(84.1%)<br>≥6y:110/115(95.7%)                                                                              | Likely to be spirometry naïve                                                                                                                                  |
| Neve <sup>8</sup>      | Asthmatics<br>3-5y         | France,<br>clinic               | 171 | FET 0.75s ; >1s<br>3y: 45%; 73%<br>4y: 60%; 80%<br>5y: 76%; 97%<br>Forced volume repeatability<br>3y: 26-57%<br>4y: 39-55%<br>5y: 53-100% | Only data from first spirometry used<br><br>14% who could not do 2 tests were excluded before study population selected.                                       |
| Olaguibel <sup>9</sup> | Healthy 3-6y               | Spain, clinic                   | 102 | 59% of those who attended<br>64% of those who agreed on the day                                                                           | Siblings of patients or non-respiratory patients recruited<br>Prior training given.                                                                            |
| Piccioni <sup>10</sup> | Healthy 3-6y               | Italy,<br>community             | 960 | 79.8% of those who attended<br>83.7% of those who agreed on the day                                                                       | 36.3% of acceptable tests had early termination and not used for FVC thus true success rate 50.8%.                                                             |
| Turner <sup>11</sup>   | Longitudinal cohort<br>5y  | Scotland,<br>community          | 827 | 77.2% ≥2 acceptable<br>68.0% 3 acceptable<br>64.8% met all criteria                                                                       | Cohort included wheezy children<br>20% FET < 1s                                                                                                                |
| Vilnozi <sup>12</sup>  | Healthy & asthmatic<br>2-6 | Israel,<br>community and clinic | 341 | 3y: H 62%, A 65%<br>4y: H 69%, A 75%<br>5y: H 75%, A 82%<br>6y: H 78%, A 88%                                                              | 75 children who could not perform spirometry were excluded before calculating success.<br>Incentive programs used<br>Asthmatics probably not spirometry naïve. |

\* These children who performed acceptable spirometry were used to calculate normative data; N/A: not available; FET: forced expiratory time; \*\* absolute numbers not presented; FET = forced expiratory time; H = healthy, A = asthmatic

**Table E2: Determining Bronchodilator Response in Pre-schoolers**

| <b>Study</b>            | <b>Population</b>                | <b>Setting</b>   | <b>Definition of BDR</b>                                                                            | <b>Lung function method</b> | <b>Positive BDR</b>                                                                                                                                                                                                                                                                                                                                                                                             | <b>comments</b>                                                          |
|-------------------------|----------------------------------|------------------|-----------------------------------------------------------------------------------------------------|-----------------------------|-----------------------------------------------------------------------------------------------------------------------------------------------------------------------------------------------------------------------------------------------------------------------------------------------------------------------------------------------------------------------------------------------------------------|--------------------------------------------------------------------------|
| Borrego <sup>13</sup>   | 43 Asthmatics, 22 controls, 3-6y | Portugal, clinic | Mean difference pre and post placebo +2SD in healthy population                                     | Spirometry                  | 14% increase in FEV <sub>0.75</sub>                                                                                                                                                                                                                                                                                                                                                                             | Based on 22 healthy controls                                             |
| Olaguibel <sup>14</sup> | 33 asthmatics, 3-6y              | Spain, clinic    | SD Index ( $\geq 2$ x of between test repeatability)<br>$\Delta$ Baseline %<br>$\Delta$ % predicted | IOS<br>Spirometry<br>sRaw   | SD Index<br>R5: -1.97 $\pm$ 1.51<br>R20: -1.03 $\pm$ 1.61<br>X5: 1.27 $\pm$ 1.23<br><br>$\Delta$ Baseline %<br>R5: -19 $\pm$ 12.7<br>R20: -10.1 $\pm$ 16<br>X5: 23.5 $\pm$ 21.1<br>sRaw: -22 $\pm$ 16.4<br>FEV <sub>1</sub> : 7.5 $\pm$ 12.7<br><br>$\Delta$ % predicted<br>R5: -16.5 $\pm$ 12.6<br>R20: -11.5 $\pm$ 16.1<br>X5: 22.0 $\pm$ 21.2<br>sRaw: -45.7 $\pm$ 42.2<br>FEV <sub>1</sub> : 7.6 $\pm$ 11.8 | One of the asthmatics had significant BDR based on the criteria defined. |

|                        |                                                                  |                             |                                                                                                |        |                                               |                                       |
|------------------------|------------------------------------------------------------------|-----------------------------|------------------------------------------------------------------------------------------------|--------|-----------------------------------------------|---------------------------------------|
| Calogero <sup>15</sup> | Healthy, 2.9-6.1y                                                | Italy, community            | >5 <sup>th</sup> % of change in R8 or >95% of change in X8 post salbutamol in healthy children | FOT    | R8: >-1.88 Z-scores<br>X8: >2.44 Z-scores     | Not validated in children with asthma |
| Mele <sup>16</sup>     | 60 healthy, 2.5-5.7y<br>60 recurrent wheeze 2.9-6.1y             | Italy, community and clinic | >5 <sup>th</sup> % of change post salbutamol in healthy children                               | Rint   | >0.26 KPa.s.L <sup>-1</sup> or >1.25 Z-scores |                                       |
| Oostveen <sup>17</sup> | 311 longitudinal cohort                                          | Belgium, community          | >5 <sup>th</sup> % change post salbutamol in never wheeze group                                | FOT R4 | >5.5 h Pa.s.L <sup>-1</sup>                   |                                       |
| Thamrin <sup>18</sup>  | 78 healthy, 39 CF, 49 nCLD, 56 asthma, 66 recurrent wheeze, 4-8y | Australia, clinic           | >5% change post salbutamol in healthy group                                                    | FOT    | R6: 42%<br>R8: 37%<br>R10: 39%                |                                       |



**Table E3. English Translation of the Screening Questionnaire.**

| <b>Does your child...</b>                                                                                    | <b>Never</b> | <b>Sometime<br/>s</b> | <b>A<br/>lot</b> | <b>Don't<br/>know</b> |
|--------------------------------------------------------------------------------------------------------------|--------------|-----------------------|------------------|-----------------------|
| Q1. Develop coughs that won't go away?                                                                       |              |                       |                  |                       |
| Q2. Wake up at night because of trouble breathing?                                                           |              |                       |                  |                       |
| Q3. Have a hard time taking a deep breath?                                                                   |              |                       |                  |                       |
| Q4. Make noisy or wheezy sounds when breathing (awake)?                                                      |              |                       |                  |                       |
| Q5. Complain about a chest that feels tight or hurts after running, playing hard, or doing sports?           |              |                       |                  |                       |
| Q6. Wake up at night coughing?                                                                               |              |                       |                  |                       |
| Q7. Cough when running, climbing stairs or playing sports?                                                   |              |                       |                  |                       |
| Q8. Miss days of kindergarten (absent from kindergarten) because of breathing problems?                      |              |                       |                  |                       |
|                                                                                                              |              |                       | <b>No</b>        | <b>Yes</b>            |
|                                                                                                              |              |                       |                  | <b>Don't know</b>     |
| Q9. Has a doctor or nurse told you that your child has asthma, reactive airway disease or wheezy bronchitis? |              |                       |                  |                       |
| Q10. Has your child stayed in the hospital overnight for asthma or for trouble breathing in the last year?   |              |                       |                  |                       |
| Q11. Does your child take medicine or use an inhaler for asthma or other respiratory disease?                |              |                       |                  |                       |

**Table E4.** Spirometric data before and after inhaled bronchodilator in healthy children and those with asthma measured on the first visit. Data, as absolute values, are shown as group mean and standard deviation (SD) (asthmatic children prescribed ICS excluded).

| Spirometry                                | Healthy children (n=364)*   |                                        |         | Children with asthma (n=203)* |                                        |         |
|-------------------------------------------|-----------------------------|----------------------------------------|---------|-------------------------------|----------------------------------------|---------|
|                                           | Baseline<br>(mean $\pm$ SD) | Post bronchodilator<br>(mean $\pm$ SD) | p-value | Baseline<br>(mean $\pm$ SD)   | Post bronchodilator<br>(mean $\pm$ SD) | p-value |
| FVC (L)                                   | 1.17 $\pm$ 0.16             | 1.21 $\pm$ 0.06                        | 0.720   | 1.14 $\pm$ 0.22               | 1.23 $\pm$ 0.12                        | 0.039   |
| FEV <sub>1</sub> (L)                      | 1.11 $\pm$ 0.12             | 1.16 $\pm$ 0.07                        | 0.567   | 0.98 $\pm$ 0.17               | 1.11 $\pm$ 0.10                        | 0.026   |
| FEV <sub>0.75</sub> (L)                   | 1.01 $\pm$ 0.10             | 1.06 $\pm$ 0.05                        | 0.482   | 0.89 $\pm$ 0.14               | 1.02 $\pm$ 0.13                        | 0.020   |
| FEV <sub>0.5</sub> (L)                    | 0.90 $\pm$ 0.09             | 0.94 $\pm$ 0.05                        | 0.538   | 0.78 $\pm$ 0.11               | 0.90 $\pm$ 0.12                        | 0.025   |
| FEF <sub>25-75</sub> (L.s <sup>-1</sup> ) | 1.50 $\pm$ 0.31             | 1.65 $\pm$ 0.28                        | 0.568   | 1.11 $\pm$ 0.41               | 1.53 $\pm$ 0.46                        | 0.014   |
| FEF <sub>25</sub> (L.s <sup>-1</sup> )    | 0.99 $\pm$ 0.20             | 1.09 $\pm$ 0.19                        | 0.564   | 0.72 $\pm$ 0.28               | 1.01 $\pm$ 0.34                        | 0.022   |
| FEF <sub>50</sub> (L.s <sup>-1</sup> )    | 1.93 $\pm$ 0.26             | 2.11 $\pm$ 0.38                        | 0.535   | 1.43 $\pm$ 0.51               | 1.99 $\pm$ 0.58                        | 0.015   |
| FEF <sub>75</sub> (L.s <sup>-1</sup> )    | 1.26 $\pm$ 0.14             | 1.38 $\pm$ 0.25                        | 0.508   | 0.94 $\pm$ 0.37               | 1.32 $\pm$ 0.39                        | 0.022   |
| PEF (L.s <sup>-1</sup> )                  | 2.47 $\pm$ 0.27             | 2.69 $\pm$ 0.44                        | 0.501   | 2.10 $\pm$ 0.62               | 2.60 $\pm$ 0.88                        | 0.039   |

\*number of children with successful spirometry on the first visit.



**Table E5.** Baseline spirometry, reported as group mean Z-scores (mean), in healthy children and those with asthma measured on the first visit (asthmatic only without ICS). The difference between groups (mean and 95% confidence intervals (CI)) are also shown. Significance was assessed using paired t-tests.

|                        | <b>Asthma<br/>(n=203)</b> | <b>Healthy<br/>(n=364)</b> | <b>Difference<br/>[mean (95% CI)]</b> | <b>p-value</b> |
|------------------------|---------------------------|----------------------------|---------------------------------------|----------------|
| z-FVC                  | -0.21                     | 0.09                       | -0.30 (-0.4 to 0.08)                  | 0.09           |
| z-FEV <sub>1</sub>     | -0.65                     | 0.25                       | -0.90 (-0.99 to 0.28)                 | 0.005          |
| z-FEV <sub>0.75</sub>  | -0.90                     | 0.09                       | -0.99 (-1.39 to 0.24)                 | 0.005          |
| z-FEV <sub>0.5</sub>   | -0.62                     | 0.06                       | -0.68 (-1.38 to 0.32)                 | 0.006          |
| z-FEF <sub>25-75</sub> | -1.11                     | -0.04                      | -1.07 (-1.01 to 0.21)                 | <0.001         |
| z-FEF <sub>25</sub>    | -1.20                     | -0.05                      | -1.15 (-1.02 to 0.11)                 | 0.003          |
| z-FEF <sub>50</sub>    | -1.01                     | -0.01                      | -1.00 (-0.97 to 0.24)                 | 0.000          |
| z-FEF <sub>75</sub>    | -0.98                     | -0.01                      | -0.97 (-0.91 to 0.16)                 | 0.004          |
| z-PEF                  | -0.32                     | 0.02                       | -0.34 (-0.32 to 0.02)                 | 0.10           |

Baseline spirometry on visit 1. CI=confidence interval.

**Table E6:** Repeatability (Cintra) and Reproducibility (Cinter) of spirometry, calculated using absolute values, in healthy children and those with asthma from lung function measured on the first visit before and after receiving placebo (asthmatic only without ICS).

| Spirometry          | Healthy (n=181) |        |         | Asthma (n=103) |        |         |
|---------------------|-----------------|--------|---------|----------------|--------|---------|
|                     | Cintra          | Cinter | p-value | Cintra         | Cinter | p-value |
| FVC                 | 12.0%           | 12.3%  | 0.699   | 13.1%          | 18.4%  | 0.121   |
| FEV <sub>1</sub>    | 11.6%           | 11.9%  | 0.711   | 12.0%          | 19.5%  | 0.201   |
| FEV <sub>0.75</sub> | 11.8%           | 11.9%  | 0.891   | 12.3%          | 23.4%  | 0.101   |
| FEV <sub>0.5</sub>  | 12.1%           | 12.3%  | 0.812   | 12.2%          | 24.5%* | 0.031   |

Within session repeatability (Cintra) calculated from children randomized to receive placebo inhalation on visit one; between session reproducibility (Cinter) calculated from baseline spirometry performed at each visit. \*Statistically significant difference (p<0.05) between Cintra and Cinter.

**Table E7.** Change in lung function after salbutamol in healthy children and those with asthma measured on the first visit (asthmatic only without ICS). Data are shown as group mean change [mean (SD)%] within the asthmatic and healthy groups and the difference [mean (95% confidence intervals) between groups].

|                     | <b>Asthma<br/>(n = 103)</b> | <b>Healthy<br/>(n = 181)</b> | <b>Difference<br/>[mean (95% CI)]</b> | <b>p-<br/>value</b> |
|---------------------|-----------------------------|------------------------------|---------------------------------------|---------------------|
| FVC                 | 7.9 (9.9)                   | 3.2 (5.2)                    | 4.7 (0.3 to 8.4)                      | 0.028               |
| FEV <sub>1</sub>    | 13.2 (9.5)                  | 4.3 (6.3)                    | 8.9 (-2.1 to 10.9)                    | 0.006               |
| FEV <sub>0.75</sub> | 14.6 (12.0)                 | 4.6 (4.9)                    | 10.0 (-5.2 to 15.3)                   | <0.001              |
| FEV <sub>0.5</sub>  | 15.4 (13.2)                 | 5.1 (6.0)                    | 10.3 (-2.1 to 12.4)                   | 0.001               |

**Table E8: Change in lung function after placebo in healthy children and those with asthma.** Data are shown as group mean change [mean (SD)%] within the asthmatic and healthy groups and the difference [mean (95% confidence intervals) between groups.

|                     | <b>Asthma<br/>(n=124)</b> | <b>Healthy<br/>(n=181)</b> | <b>Difference<br/>Mean (95% CI)</b> | <b>p-value</b> |
|---------------------|---------------------------|----------------------------|-------------------------------------|----------------|
| FVC                 | 1.2 (7.7)                 | 0.9 (6.2)                  | 0.3 (-2.1 to 1.8)                   | 0.986          |
| FEV <sub>1</sub>    | 2.4 (6.9)                 | 2.2 (6.0)                  | 0.2 (-2.7 to 3.0)                   | 0.967          |
| FEV <sub>0.75</sub> | 1.9 (4.9)                 | 1.1 (6.2)                  | 0.8 (-2.1 to 2.3)                   | 0.765          |
| FEV <sub>0.5</sub>  | 1.7 (4.2)                 | 1.0 (6.8)                  | 0.7 (-1.9 to 2.1)                   | 0.883          |

**Table E9.** Thresholds for positive bronchodilator response defined from repeatability of spirometry in healthy children (Cintra) and from ROC curve analyses. The numbers of healthy and asthmatic children classified as having a positive bronchodilator response are also shown. (asthmatic only without ICS)

|                      | Cintra    |                     | ROC                 |           |                     |                     |
|----------------------|-----------|---------------------|---------------------|-----------|---------------------|---------------------|
|                      | Threshold | BDR, n (%)          |                     | Threshold | BDR, n (%)          |                     |
|                      |           | Asthma<br>(n = 103) | Healthy<br>(n =181) |           | Asthma<br>(n = 103) | Healthy<br>(n =181) |
| FVC                  | 13.3%     | 24 (23.3%)          | 9 (5.0%)            | 5%        | 25 (50.5%)          | 52 (28.7%)          |
| FEV <sub>1</sub> (L) | 14.2%     | 27 (26.2%)          | 13 (7.2%)           | 7%        | 51 (49.5%)          | 34 (18.8%)          |
| FEV <sub>0.75</sub>  | 13.5%     | 49 (47.6%)          | 12 (6.6%)           | 11%       | 54 (52.4%)          | 21 (11.6%)          |
| FEV <sub>0.5</sub>   | 14.6%     | 45 (43.7%)          | 18 (9.9%)           | 12%       | 54 (52.4%)          | 39 (21.5%)          |

**Table E10:** Ability of change in spirometric variable following salbutamol to discriminate between asthma and healthy children (asthmatic only without ICS)

| <b>Spirometry</b>   | <b>Area</b> | <b>Threshold</b> | <b>Sensitivity</b> | <b>Specificity</b> | <b>PPV</b> | <b>NPV</b> |
|---------------------|-------------|------------------|--------------------|--------------------|------------|------------|
| FVC                 | 0.53        | 5%               | 50.5%              | 71.3%              | 50.0%      | 71.7%      |
| FEV <sub>1</sub>    | 0.68        | 7%               | 49.9%              | 81.0%              | 34.4%      | 89.1%      |
| FEV <sub>0.75</sub> | 0.72        | 11%              | 52.3%              | 88.4%              | 47.1%      | 89.3%      |
| FEV <sub>0.5</sub>  | 0.68        | 12%              | 52.7%              | 78.2%              | 32.7%      | 89.2%      |

Area = area under the Receiver-Operator-Characteristic curve; Threshold = value of spirometric variable giving the best balance between sensitivity and specificity; PPV = positive predictive value for detecting asthma; NPV = negative predictive value for excluding asthma.

## References

1. Eigen H, Bieler H, Grant D, et al. Spirometric pulmonary function in healthy preschool children. *Am J Respir Crit Care Med* 2001;163:619-23.
2. Marostica PJ, Weist AD, Eigen H, et al. Spirometry in 3- to 6-year-old children with cystic fibrosis. *Am J Respir Crit Care Med* 2002;166:67-71.
3. Jeng MJ, Chang HL, Tsai MC, et al. Spirometric pulmonary function parameters of healthy Chinese children aged 3-6 years in Taiwan. *Pediatr Pulmonol* 2009;44:676-82.
4. Joseph-Bowen J, de Klerk NH, Firth MJ, Kendall GE, Holt PG, Sly PD. Lung function, bronchial responsiveness, and asthma in a community cohort of 6-year-old children. *Am J Respir Crit Care Med* 2004;169:850-4.
5. Kampschmidt JC, Brooks EG, Cherry DC, Guajardo JR, Wood PR. Feasibility of spirometry testing in preschool children. *Pediatr Pulmonol* 2015.
6. Nystad W, Samuelsen SO, Nafstad P, Edvardsen E, Stensrud T, Jaakkola JJK. Feasibility of measuring lung function in preschool children. *Thorax* 2002;57:1021-7.
7. Leung TF, Liu TC, Mak KK, et al. Reference standards for forced expiratory indices in Chinese preschool children. *Pediatr Pulmonol* 2013;48:1119-26.
8. Neve V, Edme JL, Devos P, et al. Spirometry in 3-5-year-old children with asthma. *Pediatr Pulmonol* 2006;41:735-43.
9. Olaguibel Rivera JM, Alvarez Puebla MJ, Arroabarren Aleman E, Cambra K, Uribe San Martin MP, De Esteban Chocarro B. Spirometric and exhaled nitric oxide reference values in preschool children from the community of Navarra. *J Investig Allergol Clin Immunol* 2014;24:169-76.
10. Piccioni P, Borraccino A, Forneris MP, et al. Reference values of Forced Expiratory Volumes and pulmonary flows in 3-6 year children: a cross-sectional study. *Respir Res* 2007;8:14.
11. Turner SW, Craig LC, Harbour PJ, et al. Spirometry in 5-year-olds--validation of current guidelines and the relation with asthma. *Pediatr Pulmonol* 2007;42:1144-51.
12. Vilozni D, Barak A, Efrati O, et al. The role of computer games in measuring spirometry in healthy and "asthmatic" preschool children. *Chest* 2005;128:1146-55.
13. Borrego LM, Stocks J, Almeida I, et al. Bronchodilator responsiveness using spirometry in healthy and asthmatic preschool children. *Arch Dis Child* 2013;98:112-7.
14. Olaguibel JM, Alvarez-Puebla MJ, Anda M, et al. Comparative analysis of the bronchodilator response measured by impulse oscillometry (IOS), spirometry and body plethysmography in asthmatic children. *J Investig Allergol Clin Immunol* 2005;15:102-6.
15. Calogero C, Parri N, Baccini A, et al. Respiratory impedance and bronchodilator response in healthy Italian preschool children. *Pediatr Pulmonol* 2010;45:1086-94.
16. Mele L, Sly PD, Calogero C, et al. Assessment and validation of bronchodilation using the interrupter technique in preschool children. *Pediatr Pulmonol* 2010;45:633-8.
17. Oostveen E, Dom S, Desager K, Hagendorens M, De Backer W, Weyler J. Lung function and bronchodilator response in 4-year-old children with different wheezing phenotypes. *Eur Respir J* 2010;35:865-72.
18. Thamrin C, Gangell CL, Udomittipong K, et al. Assessment of bronchodilator responsiveness in preschool children using forced oscillations. *Thorax* 2007;62:814-9.
